# Supplementary material for: Long non-coding RNA DANCR stabilizes HIF-1α and promotes metastasis by interacting with NF90/NF45 complex in nasopharyngeal carcinoma
Source: PubMed Central journal article supplement — Theranostics. 2018 Nov 10;8(20):5676–89. doi: 10.7150/thno.28538 (PMC6276287; doi:10.7150/thno.28538), 2018-11-10
Supplement: thnov08p5676s1.pdf [file thnov08p5676s1.pdf]

## Supplementary Materials

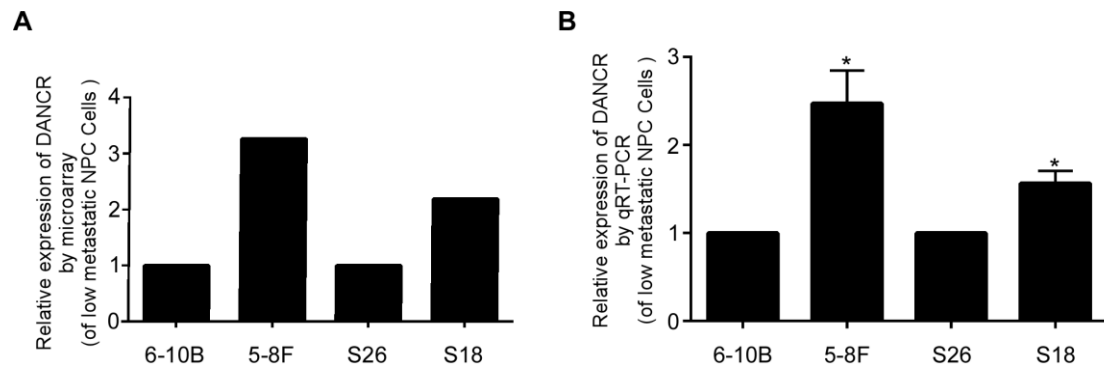

**Figure S1. DANCR is upregulated in NPC cell lines with high metastatic potential.**

(A) Relative expression of DANCR in NPC cell lines with high metastatic potential (5-8F and S18) and those with low metastatic potential (6-10B and S26) according to the microarray data (GSE89804). (B) Relative expression of DANCR in NPC cell lines with high or low metastatic potential by quantitative RT-PCR for validation. Data are presented as means  $\pm$  SD. Student's *t*-tests, \* $P < 0.05$ .

**A**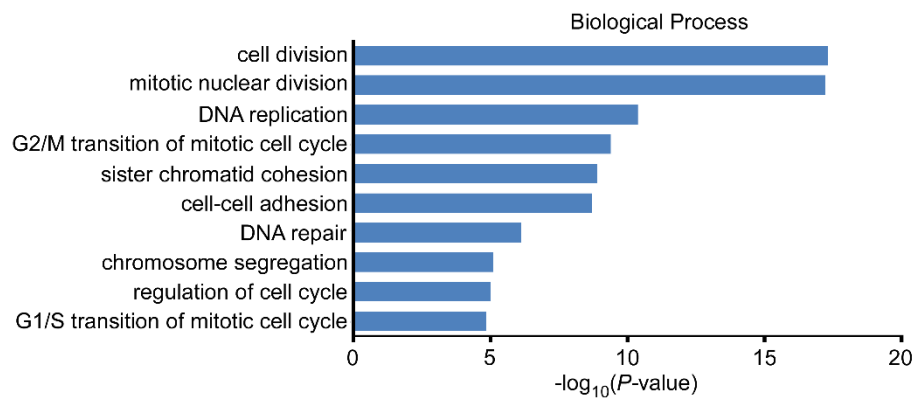**B**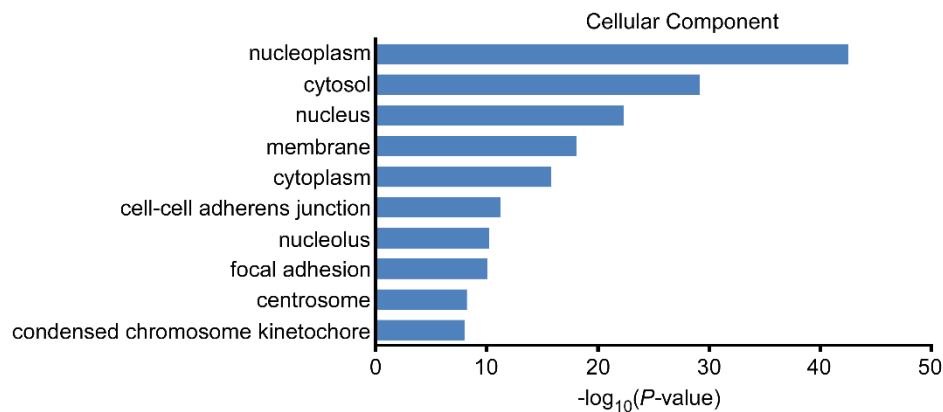**C**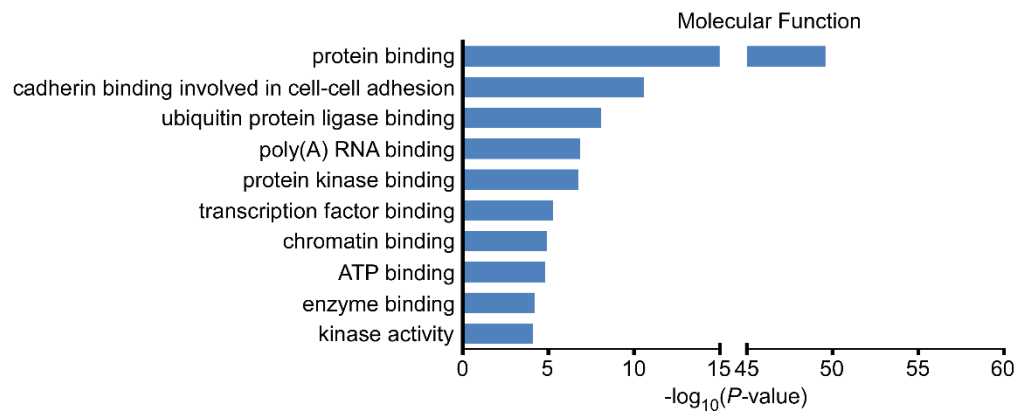

**Figure S2. Gene ontology (GO) analysis of dysregulated genes after silencing DANCR.**

(A–C) The top ten enrichment score values ( $-\log_{10}(P\text{-value})$ ) for significantly enriched GO terms including Biological Process (A), Cellular Component (B) and Molecular Function (C).

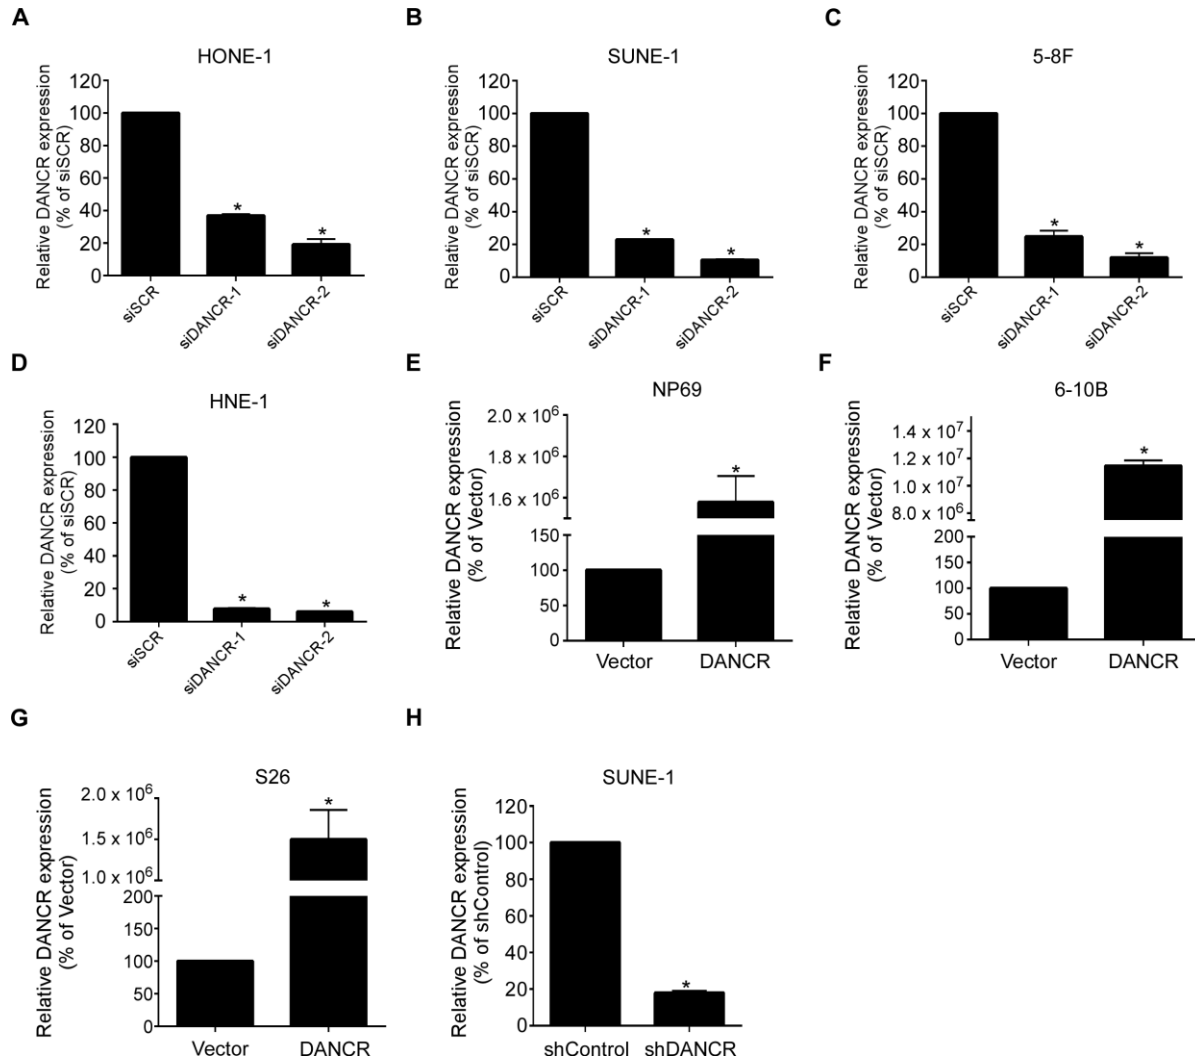

**Figure S3. The efficiency of transfection in NPC cells.**

(A-D), Relative expression of DANCR in HONE-1 (A), SUNE-1 (B), 5-8F (C) and HNE-1 (D) cells that transiently transfected with DANCR-siRNAs or scramble control. (E-G), Relative expression of DANCR in NP69 (E), 6-10B (F) and S26 (G) cells that transfected with DANCR-overexpressing plasmid or the vector control. (H) Relative expression of DANCR in SUNE-1 cell that stably expressing DANCR-shRNA or control shRNA. Data are presented as means  $\pm$  SD. Student's *t*-tests, \**P*<0.05. The experiments were independently repeated 3 times. (SiRNA to transiently knock-down DANCR in NPC cell lines was used for *in vitro* experiments, quantitative RT-PCR and western blotting assays. ShRNA to stably knock-down DANCR in SUNE-1 cells was used for *in vivo* experiments and RIP assays.)

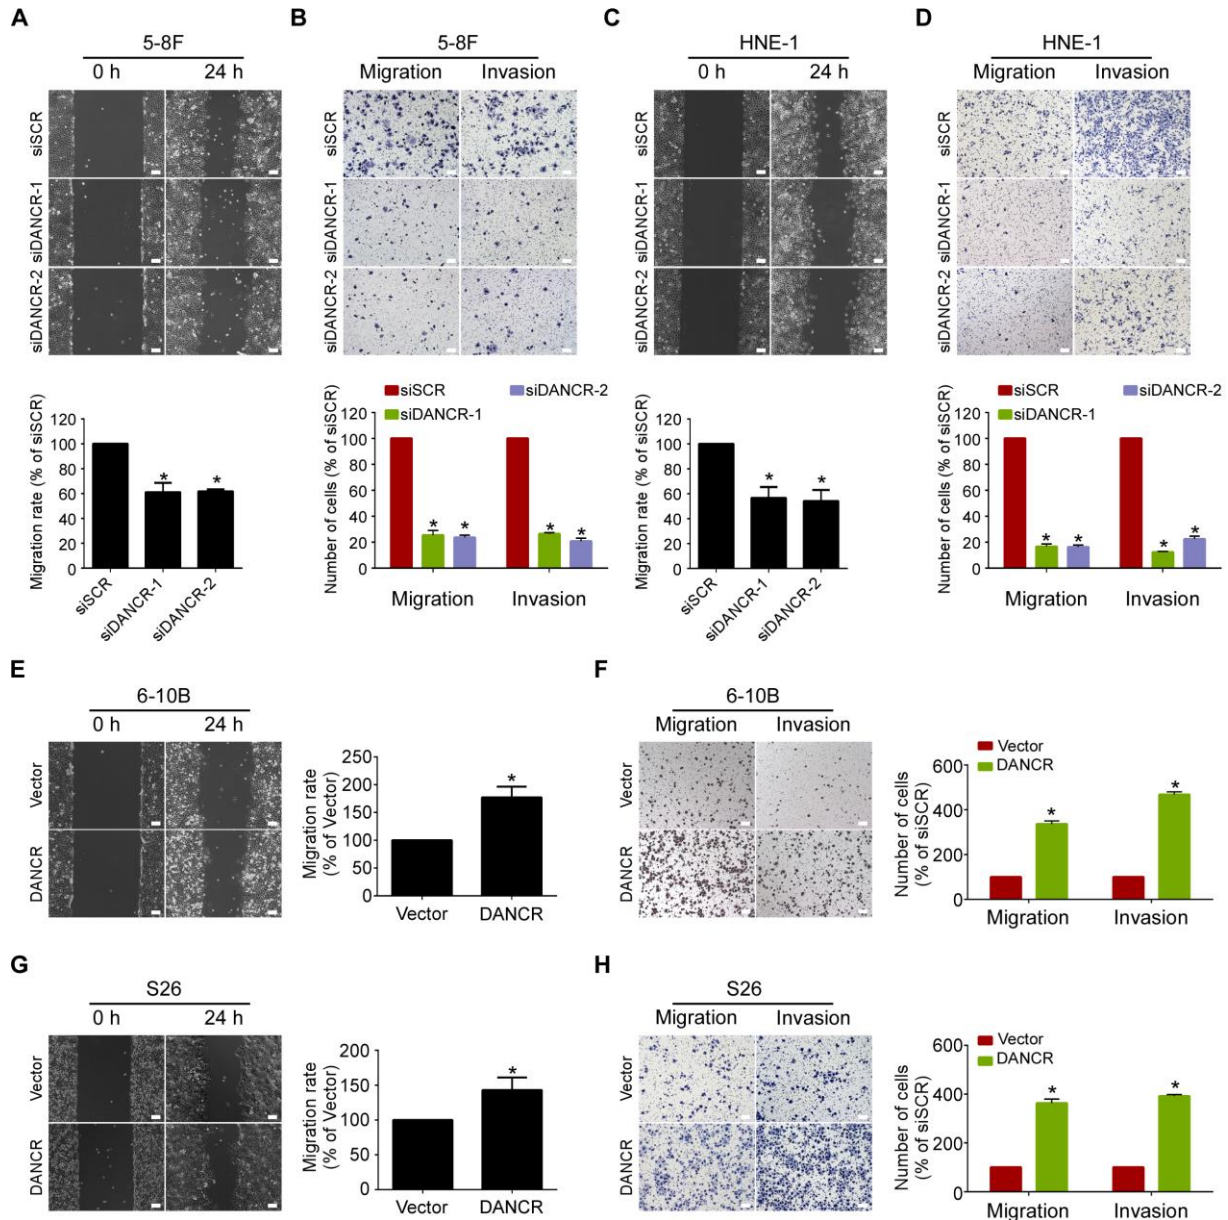

**Figure S4. DANCER promotes NPC cell migration and invasion *in vitro*.**

(A-B), Representative and quantification results of the wound healing assay (A), Transwell migration and invasion assays (B) for 5-8F cells that transfected with DANCER siRNAs or the scramble control. (C-D), Representative and quantification results of the wound healing assay (C), Transwell migration and invasion assays (D) for HNE-1 cells that transfected with DANCER siRNAs or the scramble control. (E-F) Representative and quantification results of the wound healing assay (E), Transwell migration and invasion assays (F) for 6-10B cells that transfected with DANCER-overexpressing plasmid or the vector control. (G-H) Representative and quantification results of the wound healing assay (G), Transwell migration and invasion assays (H) for S26 cells that transfected with DANCER-overexpressing plasmid or the vector control. Scale bar, 100  $\mu$ m. Data are presented as means  $\pm$  SD. Student's *t*-tests, \**P*<0.05. The experiments were independently repeated 3 times.

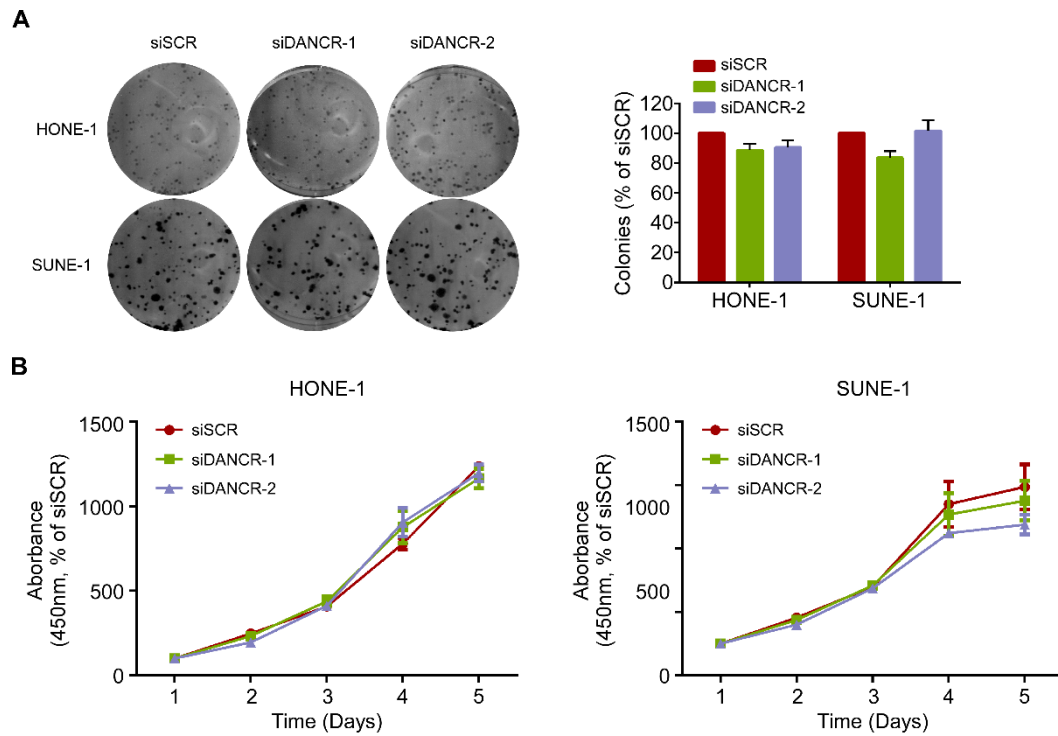

**Figure S5. DANCR has little effect on NPC cell proliferation *in vitro*.**

(A) Representative and quantification of the colony formation assay of HONE-1 and SUNE-1 cells that transfected with DANCR siRNAs or scramble control. (B) CCK8 assays of HONE-1 and SUNE-1 cells that transfected with DANCR siRNAs or scramble control. Data are presented as means  $\pm$  SD. Student's *t*-tests, all  $P > 0.05$ . The experiments were independently repeated 3 times.

**A**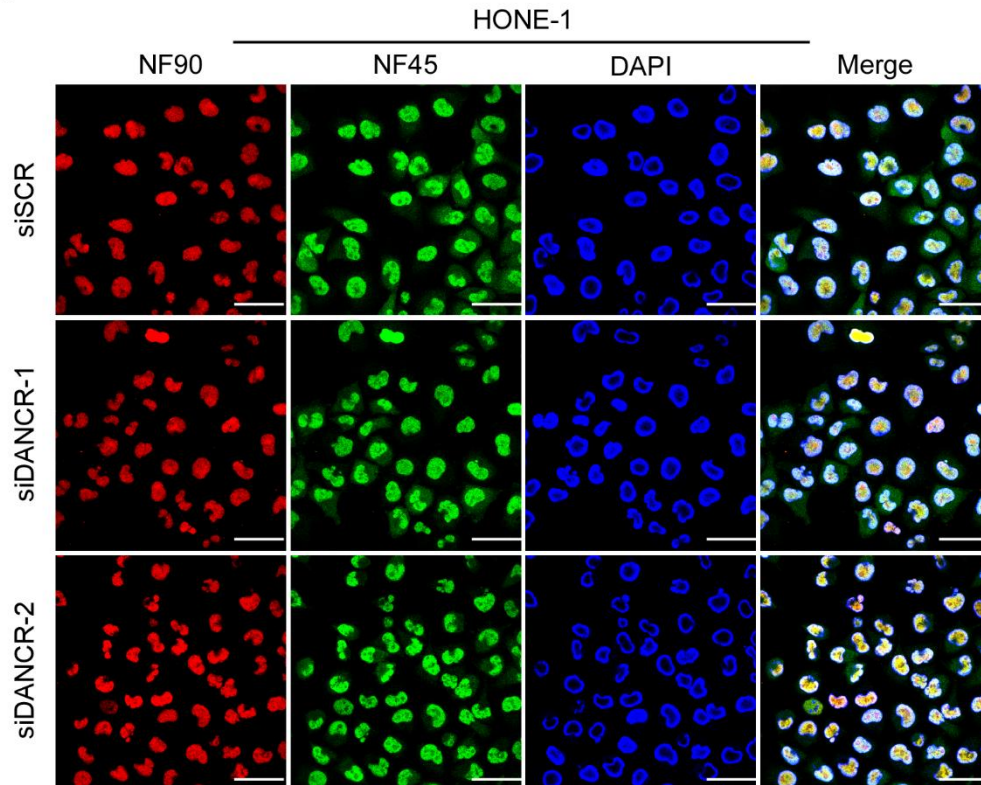

**Figure S6. Localization and expression level of NF90 and NF45 after DANCR knockdown.**

(A) Immunofluorescence images for DANCR expression in HONE-1 cells transfected with the scramble control or DANCR siRNAs. Scale bar, 50  $\mu$ m.

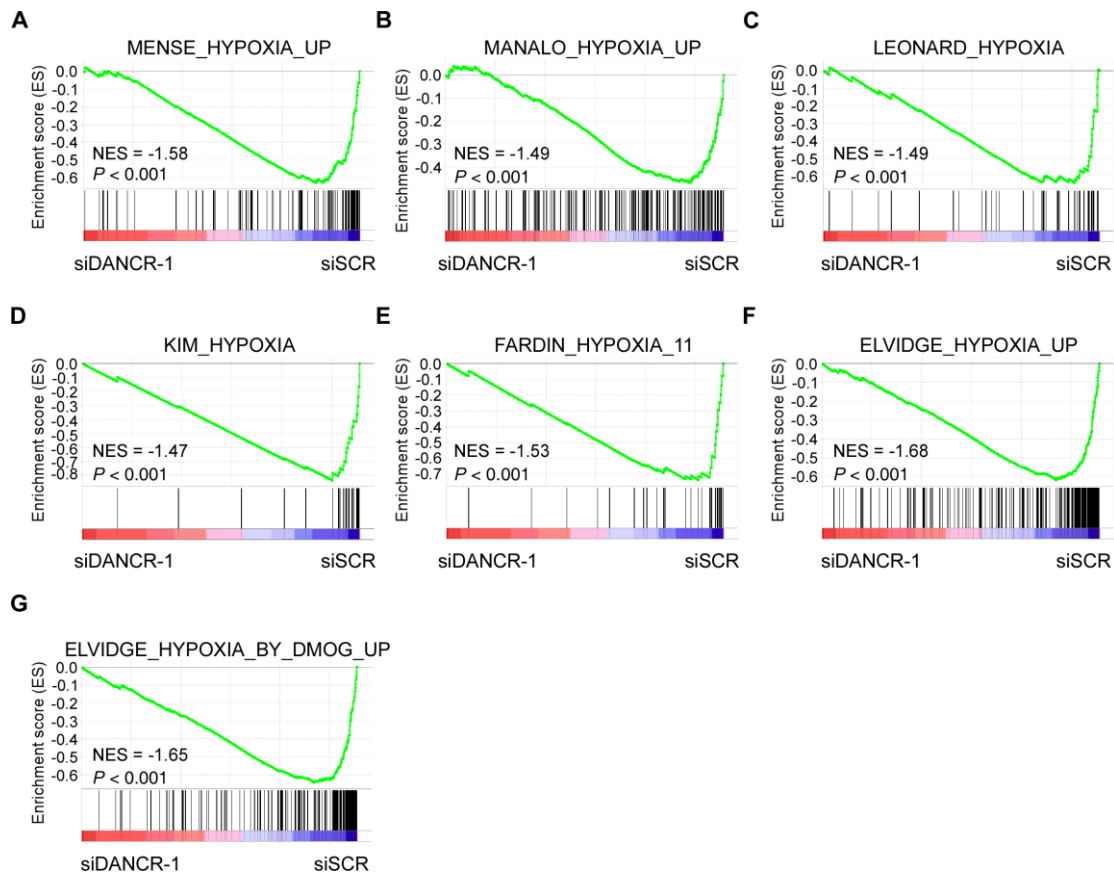

**Figure S7. The correlation between hypoxic gene sets and DANCER expression assessing via Gene Set Enrichment Analysis (GSEA).**

(A-G) Overview of GSEA used to identify the hypoxia related gene sets in SUNE-1 cells that transfected with DANCER siRNA or the scramble control, including Mense\_Hypoxia\_Up (A), Manalo\_Hypoxia\_Up (B), Leonard\_Hypoxia (C), Kim\_Hypoxia (D), Fardin\_Hypoxia\_11 (E), Elvidge\_Hypoxia\_Up (F) and Elvidge\_Hypoxia\_By\_DMOG\_Up (G). NES, normalized enrichment score.

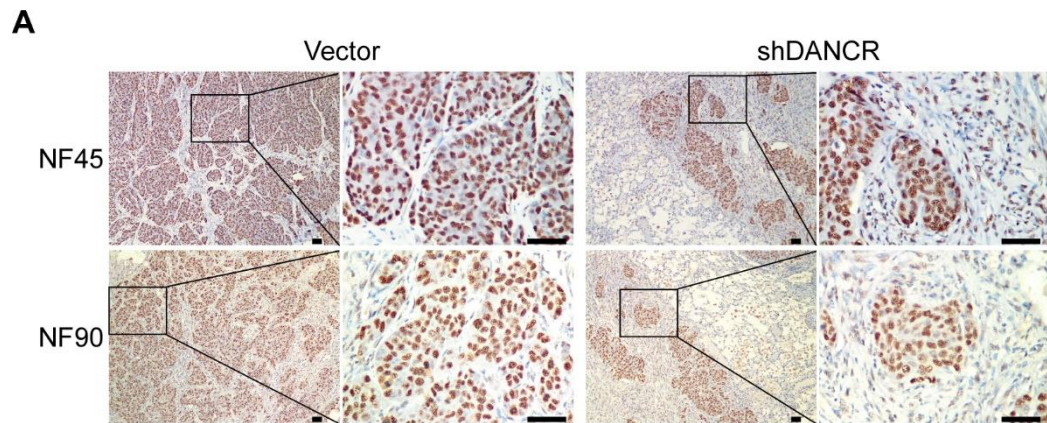

**Figure S8. The expression of NF45 and NF90 *in vivo*.**

(A) Immunohistochemical staining for HOPX and SNAIL expression in the lungs of mice xenograft ( $\times 100$  and  $\times 400$ ). Scale bar, 50  $\mu$ m.

Full unedited gel for Figure 3C

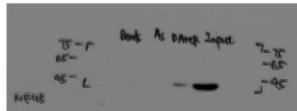

Full unedited gel for Figure 3D

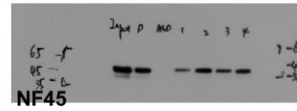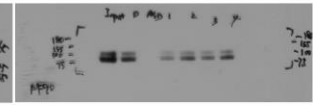

Full unedited gel for Figure 3H

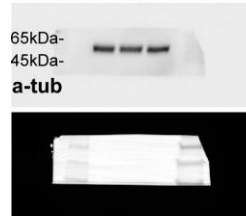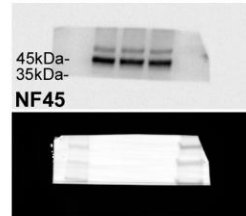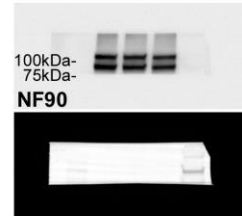

Full unedited gel for Figure 4D

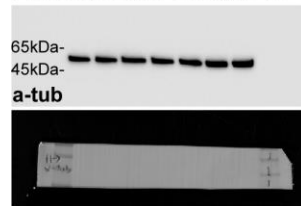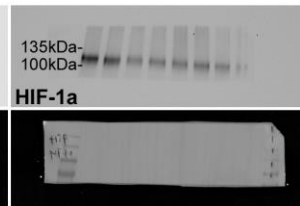

Full unedited gel for Figure 4E

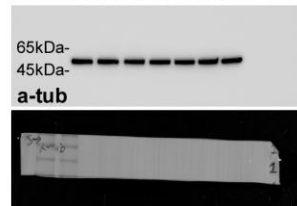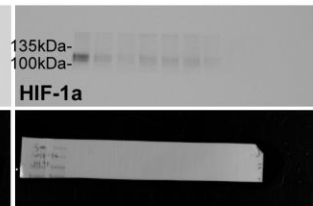

**Figure S9. The full unedited gels of western blot assays.**

**Table S1. Primers used in this study.**

| Gene                                                                  | Sequence (5' to 3')    |
|-----------------------------------------------------------------------|------------------------|
| <b>Primers for qRT-PCR from freshly-frozen tissues and cell lines</b> |                        |
| GAPDH-F                                                               | CCATGAGAAGTATGACAACAGC |
| GAPDH-R                                                               | ATGGACTGTGGTCATGAGTC   |
| DANCR-F                                                               | AGTTCTTAGCGCAGGTTGAC   |
| DANCR-R                                                               | AAGGTGAACATGAAGCACCT   |
| HIF1A-F                                                               | CAGCAACGACACAGAACTG    |
| HIF1A-R                                                               | AAAGTTCCAGTGACTCTGGA   |
| <b>Primers for qRT-PCR from FFPE tissues</b>                          |                        |
| ACTB-F                                                                | GCATGGGTCAGAAGGATTCC   |
| ACTB-R                                                                | AGGATGCCTCTCTTGCTCTG   |
| DANCR-F                                                               | CTCTTACGTCTGCGGAAGTG   |
| DANCR-R                                                               | CCTGTAGTTGTCAACCTGCG   |
| <b>siRNA sequences</b>                                                |                        |
| siSCR sense                                                           | UUCUCCGAACGUGUCACGUTT  |
| siSCR antisense                                                       | ACGUGACACGUUCGGAGAATT  |
| siDANCR-1 sense                                                       | CGGUCAUGAGAUUAUAUGUTT  |
| siDANCR-1 antisense                                                   | ACAUAUAAUCUCAUGACCGTT  |
| siDANCR-2 sense                                                       | GCCAUUGAAGCUGGAAUGUTT  |
| siDANCR-2 antisense                                                   | ACAUCCAGCUUCAUUGGCTT   |
| siNF90-1 sense                                                        | GAUGCUGCGAUUGUGAUAATT  |
| siNF90-1 antisense                                                    | UUAUCACAAUCGCAGCAUCTT  |
| siNF90-2 sense                                                        | GGAGGUUGAUGGCAAUUCATT  |
| siNF90-2 antisense                                                    | UGAAUUGCCAUAACCUCCTT   |
| siNF45-1 sense                                                        | CUUUGUACCACAUAUCCCAT   |
| siNF45-1 antisense                                                    | UGGGAUAUGUGGUACAAAGTT  |
| siNF45-2 sense                                                        | GAACUCCAUUUGGAUAUCATT  |
| siNF45-2 antisense                                                    | UGAUAUCCAAAUGGAGUUCTT  |
| <b>shRNA sequences</b>                                                |                        |
| DANCR                                                                 | GGAGCTAGAGCAGTGACAATG  |

**Table S2. Antibodies used in this study.**

| Antibody                       | Company    | Catalog no. | Dilution |
|--------------------------------|------------|-------------|----------|
| <b>Western blotting</b>        |            |             |          |
| NF90                           | abcam      | ab92355     | 1:2000   |
| NF45                           | Santa Cruz | sc-271718   | 1:500    |
| Mouse                          | CST        | 7076        | 1:5000   |
| Rabbit                         | CST        | 7074        | 1:5000   |
| HIF1A                          | CST        | 14179       | 1:250    |
| <b>Immunofluorescence</b>      |            |             |          |
| NF90                           | abcam      | ab92355     | 1:400    |
| NF45                           | Santa Cruz | sc-271718   | 1:200    |
| <b>Immunohistochemistry</b>    |            |             |          |
| NF90                           | abcam      | ab92355     | 1:100    |
| NF45                           | Santa Cruz | sc-271718   | 1:50     |
| <b>RNA-Immunoprecipitation</b> |            |             |          |
| NF90                           | abcam      | ab92355     | 5 µg/ml  |
| NF45                           | Santa Cruz | sc-271718   | 5 µg/ml  |

**Table S3. Correlation between the clinicopathological features and DANCER expression in 212 patients with nasopharyngeal carcinoma.**

| Characteristic              | No. of patients | DANCER expression |                    | <i>P</i> Value* |
|-----------------------------|-----------------|-------------------|--------------------|-----------------|
|                             |                 | Low, <i>n</i> (%) | High, <i>n</i> (%) |                 |
| <b>Age</b>                  |                 |                   |                    |                 |
| ≤ 45 years                  | 84              | 25 (33.8)         | 59 (42.8)          | 0.203           |
| >45 years                   | 128             | 49 (66.2)         | 79 (57.2)          |                 |
| <b>Gender</b>               |                 |                   |                    |                 |
| Male                        | 164             | 59 (79.7)         | 105 (76.1)         | 0.546           |
| Female                      | 48              | 15 (20.3)         | 33 (23.9)          |                 |
| <b>WHO Type</b>             |                 |                   |                    |                 |
| II                          | 0               | 0 (0)             | 0(0)               |                 |
| III                         | 212             | 74 (100)          | 138 (100)          |                 |
| <b>VCA-IgA</b>              |                 |                   |                    |                 |
| < 1:80                      | 20              | 7 (9.5)           | 13 (9.4)           | 1.000           |
| ≥ 1:80                      | 192             | 67 (90.5)         | 125 (90.6)         |                 |
| <b>EA-IgA</b>               |                 |                   |                    |                 |
| < 1:10                      | 36              | 15 (20.3)         | 21 (15.2)          | 0.350           |
| ≥ 1:10                      | 176             | 59 (79.7)         | 117 (84.8)         |                 |
| <b>T Stage</b>              |                 |                   |                    |                 |
| T1-T2                       | 29              | 8 (10.8)          | 21 (15.2)          | 0.496           |
| T3-T4                       | 183             | 66 (89.2)         | 117 (84.8)         |                 |
| <b>N Stage</b>              |                 |                   |                    |                 |
| N0-N1                       | 121             | 44 (59.5)         | 77 (55.8)          | 0.608           |
| N2-N3                       | 91              | 30 (40.5)         | 61 (44.2)          |                 |
| <b>TNM Stage</b>            |                 |                   |                    |                 |
| III                         | 127             | 42 (56.8)         | 85 (61.6)          | 0.493           |
| IV                          | 85              | 32 (43.2)         | 53 (38.4)          |                 |
| <b>Locoregional failure</b> |                 |                   |                    |                 |
| No                          | 171             | 61 (82.4)         | 110 (79.7)         | 0.767           |
| Yes                         | 41              | 13 (17.6)         | 28 (20.3)          |                 |
| <b>Distant metastasis</b>   |                 |                   |                    |                 |
| No                          | 167             | 66 (89.2)         | 101 (73.2)         | <b>0.011</b>    |
| Yes                         | 45              | 8 (10.8)          | 37 (26.8)          |                 |
| <b>Death</b>                |                 |                   |                    |                 |
| No                          | 139             | 56 (75.7)         | 83 (60.1)          | <b>0.023</b>    |
| Yes                         | 73              | 18 (24.3)         | 55 (39.9)          |                 |

Abbreviations: VCA-IgA, viral capsid antigen immunoglobulin A; EA-IgA, early antigen immunoglobulin A. Bold values indicate  $P < 0.05$ ,  $P$  value is determined by  $\chi^2$  and Fisher's exact tests.

**Table S4. Univariate and multivariable Cox regression analysis of prognostic factors in 212 patients with nasopharyngeal carcinoma.**

| Variable                                | Univariate analysis |           |              | Multivariate analysis |           |              |
|-----------------------------------------|---------------------|-----------|--------------|-----------------------|-----------|--------------|
|                                         | HR                  | 95%CI     | P-value      | HR                    | 95%CI     | P-value      |
| <b>Overall survival</b>                 |                     |           |              |                       |           |              |
| DANCR expression (high vs. low)         | 1.80                | 1.05-3.06 | <b>0.031</b> | 1.78                  | 1.04-3.03 | <b>0.034</b> |
| T stage (T3-T4 vs. T1-T2)               | 1.38                | 0.66-2.88 | 0.388        |                       |           |              |
| N stage (N2-N3 vs. N0-N1)               | 2.05                | 1.29-3.26 | <b>0.002</b> | 2.04                  | 1.28-3.25 | <b>0.003</b> |
| Age ( $\geq 45$ vs. $<45$ years)        | 1.33                | 0.82-2.17 | 0.249        |                       |           |              |
| Gender (Male vs. female)                | 1.32                | 0.97-1.80 | 0.077        |                       |           |              |
| VCA IgA ( $\geq 1:80$ vs. $< 1:80$ )    | 1.42                | 0.62-3.28 | 0.412        |                       |           |              |
| EA IgA ( $\geq 1:10$ vs. $< 1:10$ )     | 1.05                | 0.58-1.92 | 0.863        |                       |           |              |
| <b>Disease-free survival</b>            |                     |           |              |                       |           |              |
| DANCR expression (high vs. low)         | 1.70                | 1.02-2.84 | <b>0.042</b> | 1.68                  | 1.01-2.81 | <b>0.047</b> |
| T stage (T3-T4 vs. T1-T2)               | 1.19                | 0.59-2.38 | 0.631        |                       |           |              |
| N stage (N2-N3 vs. N0-N1)               | 2.16                | 1.37-3.42 | <b>0.001</b> | 2.15                  | 1.36-3.39 | <b>0.001</b> |
| Age ( $\geq 45$ vs. $<45$ years)        | 1.06                | 0.66-1.69 | 0.807        |                       |           |              |
| Gender (Male vs. female)                | 0.86                | 0.65-1.14 | 0.283        |                       |           |              |
| VCA IgA ( $\geq 1:80$ vs. $< 1:80$ )    | 1.35                | 0.58-3.10 | 0.486        |                       |           |              |
| EA IgA ( $\geq 1:10$ vs. $< 1:10$ )     | 0.93                | 0.52-1.67 | 0.816        |                       |           |              |
| <b>Distant metastasis-free survival</b> |                     |           |              |                       |           |              |
| DANCR expression (high vs. low)         | 2.84                | 1.32-6.11 | <b>0.007</b> | 2.88                  | 1.34-6.20 | <b>0.007</b> |
| T stage (T3-T4 vs. T1-T2)               | 1.31                | 0.52-3.31 | 0.574        |                       |           |              |
| N stage (N2-N3 vs. N0-N1)               | 2.83                | 1.54-5.22 | <b>0.001</b> | 2.63                  | 1.42-4.85 | <b>0.002</b> |
| Age ( $\geq 45$ vs. $<45$ years)        | 1.04                | 0.57-1.90 | 0.906        |                       |           |              |
| Gender (Male vs. female)                | 0.61                | 0.39-0.98 | <b>0.039</b> | 0.38                  | 0.15-0.97 | 0.043        |
| VCA IgA ( $\geq 1:80$ vs. $< 1:80$ )    | 1.62                | 0.50-5.23 | 0.420        |                       |           |              |
| EA IgA ( $\geq 1:10$ vs. $< 1:10$ )     | 1.46                | 0.62-3.44 | 0.391        |                       |           |              |

Abbreviations: VCA-IgA, viral capsid antigen immunoglobulin A; EA-IgA, early antigen immunoglobulin A. Bold values indicate  $P < 0.05$ ,  $P$  value is determined by Cox regression analysis.

**Table S5. Proteins found by mass spectrometry analysis in the antisense-DANCR group (negative control).**

| Protein                             | Score  |
|-------------------------------------|--------|
| Pyruvate carboxylase, mitochondrial | 231.75 |
| Acetyl-CoA carboxylase 1            | 223.25 |
| 40S ribosomal protein S16           | 115.06 |
| Tubulin beta chain                  | 80.78  |
| 40S ribosomal protein S18           | 44.79  |
| 40S ribosomal protein S15           | 42.35  |
| Putative beta-actin-like protein 3  | 33.55  |
| 60S ribosomal protein L23a          | 29.26  |
| Fructose-bisphosphate aldolase A    | 29.09  |
| Keratin, type I cytoskeletal 10     | 29.09  |

**Table S6. Proteins found by mass spectrometry analysis in the DANCER group.**

| Protein                                                  | Score  |
|----------------------------------------------------------|--------|
| Acetyl-CoA carboxylase 1                                 | 289.22 |
| <b>Interleukin enhancer-binding factor 3</b>             | 181.91 |
| Nuclease-sensitive element-binding protein 1             | 156.52 |
| ATP-dependent RNA helicase A                             | 156.39 |
| Pyruvate carboxylase, mitochondrial                      | 135.88 |
| 40S ribosomal protein S16                                | 123.38 |
| <b>Interleukin enhancer-binding factor 2</b>             | 103.79 |
| Heterogeneous nuclear ribonucleoproteins A2/B1           | 93.65  |
| 60S ribosomal protein L27a                               | 68.62  |
| Nucleolin                                                | 65.69  |
| Heterogeneous nuclear ribonucleoprotein K                | 61.96  |
| 40S ribosomal protein S7                                 | 61.58  |
| Heterogeneous nuclear ribonucleoprotein A1-like 2        | 58.79  |
| Leucine-rich PPR motif-containing protein, mitochondrial | 57.10  |
| Heterogeneous nuclear ribonucleoprotein A3               | 53.39  |
| Polymerase I and transcript release factor               | 52.66  |
| Matrin-3                                                 | 49     |
| Tubulin beta-1 chain                                     | 48.92  |
| Rap guanine nucleotide exchange factor 2                 | 45.29  |
| Serine/arginine-rich splicing factor 1                   | 44.11  |
| Putative beta-actin-like protein 3                       | 40.48  |
| Fructose-bisphosphate aldolase A                         | 40.44  |
| Ezrin                                                    | 39.48  |
| Y-box-binding protein 3                                  | 39.15  |
| Probable ATP-dependent RNA helicase DDX5                 | 38.42  |
| Far upstream element-binding protein 2                   | 37.06  |
| Dynein heavy chain 8, axonemal                           | 36.95  |
| Elongation factor 1-alpha 1                              | 35.92  |
| Protein unc-13 homolog C                                 | 35.43  |
| Very-long-chain enoyl-CoA reductase                      | 35.16  |
| Transcription regulator protein BACH2                    | 35.11  |
| Nucleolar RNA helicase 2                                 | 35.03  |
| 40S ribosomal protein S11                                | 34.85  |
| Collagen alpha-1(XV) chain                               | 34.06  |
| Heterogeneous nuclear ribonucleoprotein A/B              | 31.56  |
| Zinc finger E-box-binding homeobox 1                     | 31.03  |
| RAS protein activator like-3                             | 30.94  |
| Filaggrin                                                | 29.48  |
| DNA-directed RNA polymerase I subunit RPA2               | 29.16  |
